# Supplementary material
Source: PubMed Central journal article supplement (PMC7859708)
Supplement: mmc1.pdf [file mmc1.pdf]

# Supporting information

## Targeting C-terminal helical bundle of NCOVID19 Envelope (E) protein

Shruti Mukherjee,<sup>1</sup> Amaravadhi Harikishore,<sup>2,\*</sup> Anirban Bhunia<sup>1,\*</sup>

<sup>1</sup>Department of Biophysics, Bose Institute, Kolkata 700 054, India

<sup>2</sup>School of Biological Sciences, Nanyang Technological University, Singapore 637541, Singapore

\*To whom correspondence should be addressed:

Dr. Anirban Bhunia

Email: [anirbanbhunia@gmail.com](mailto:anirbanbhunia@gmail.com) or [bhunias@jcbose.ac.in](mailto:bhunias@jcbose.ac.in)

Dr. Amaravadhi Harikishore

Email: [amar0002@e.ntu.edu.sg](mailto:amar0002@e.ntu.edu.sg)

**Table 1:** Thirteen ligands were mapped to the NCOVID19 envelope protein based pharmacophore from the recently reported 133 FDA drug molecules that were able to inhibit SARS-CoV2 infection in Vero cell line screen. These ligands are used as internal control in our study.

| Sl.NO | chembl_id     | chembl_pref_name          | FitValue |
|-------|---------------|---------------------------|----------|
| 1     | CHEMBL36342   | OCTENIDINE HYDROCHLORIDE  | 4.40544  |
| 2     | CHEMBL4303781 | None                      | 3.87139  |
| 3     | CHEMBL729     | LOPINAVIR                 | 3.84105  |
| 4     | CHEMBL4303661 | None                      | 3.82407  |
| 5     | CHEMBL4065616 | REMDESIVIR                | 3.67963  |
| 6     | CHEMBL1751    | DIGOXIN                   | 3.51426  |
| 7     | CHEMBL95431   | CARBOXYAMIDOTRIAZOLE      | 3.44995  |
| 8     | CHEMBL4303781 | None                      | 3.42836  |
| 9     | CHEMBL4303522 | None                      | 3.40554  |
| 10    | CHEMBL1208572 | SALINOMYCIN               | 3.40129  |
| 11    | CHEMBL46286   | OMACETAXINE MEPESUCCINATE | 3.39726  |
| 12    | CHEMBL264241  | ANIDULAFUNGIN             | 3.3379   |
| 13    | CHEMBL4303448 | None                      | 3.12001  |
| 14    | CHEMBL3786230 | None                      | 2.46894  |

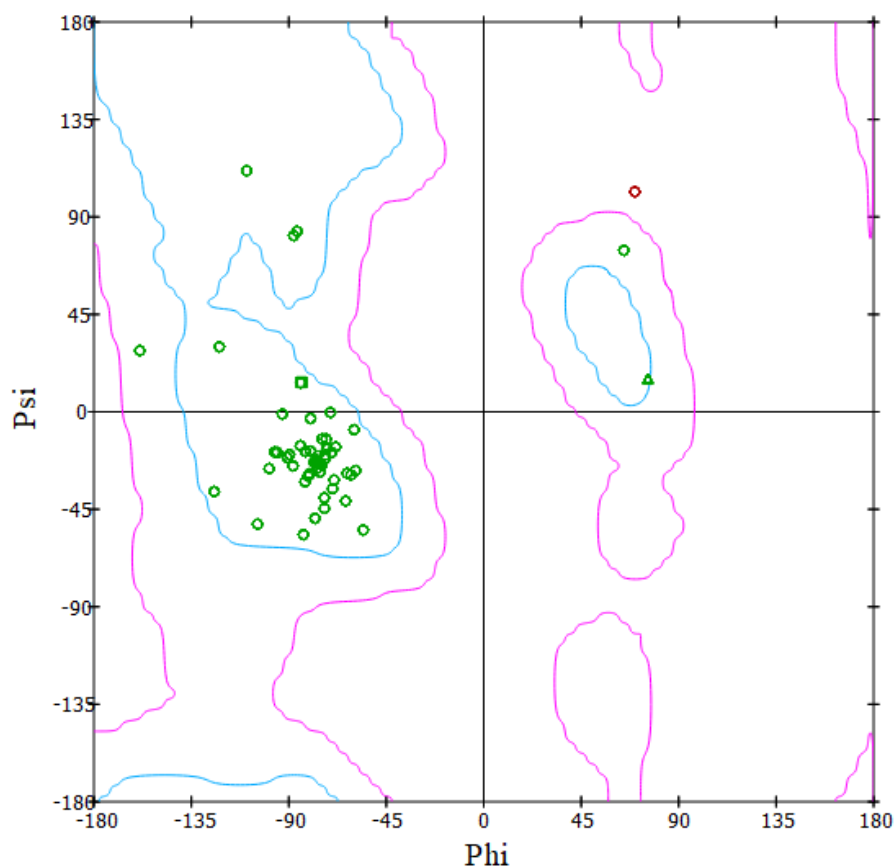

**Supplementary Figure 1:** Ramachandran Plot showing most of the residues are in most favoured regions and only one residue in generously allowed region (~1), suggesting good stereochemical quality of the homology model.

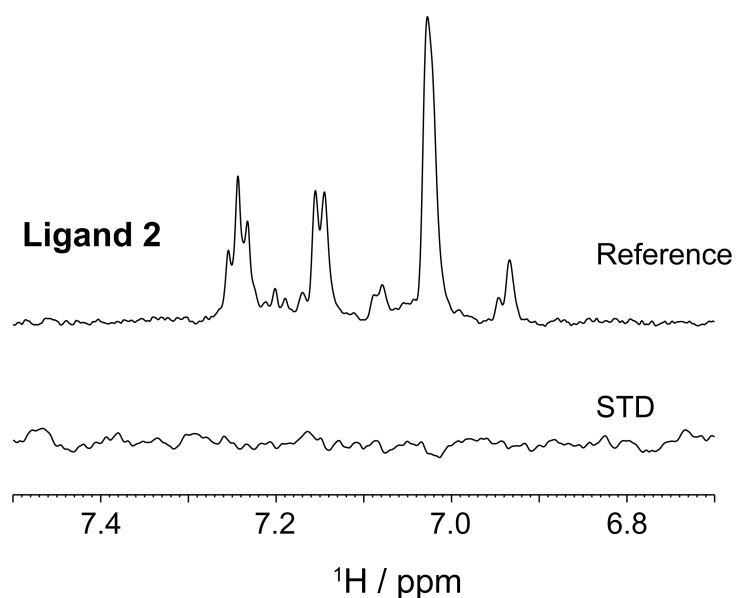

**Supplementary Figure 2:** STD NMR spectrum of **Ligand 2** binding to NCOVID 19 E protein. No STD signal of **ligand 2** was observed upon binding to E protein, signifying non-binder.

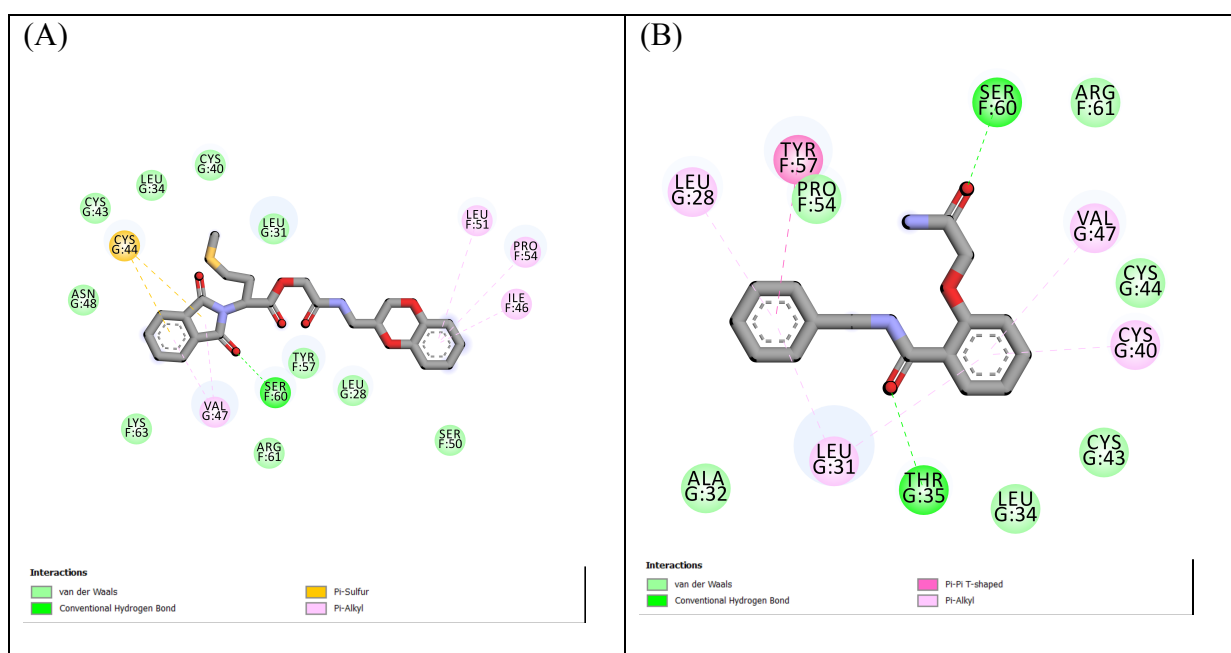

**Supplementary Figure 3:** 2D interaction plot for the interaction between the lead compounds and C-terminal domain of E protein (A) ZINC23221929, (B) ZINC06220062.

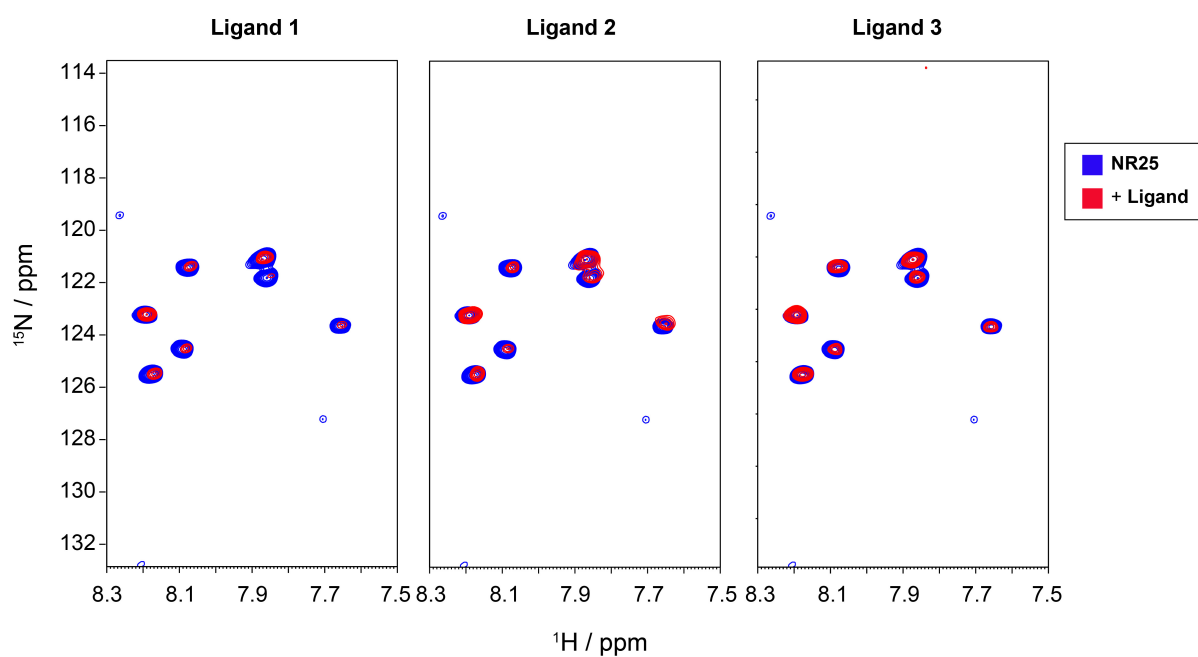

**Supplementary Figure 4:** 2D  $^1\text{H}$ - $^{15}\text{N}$  HSQC spectra of NR25 in the absence (blue colour) and presence (red colour) of ligands **1**, **2** or **3**. The experiment was performed using Bruker Avance III 700 MHz using RT probe and at 298 K.
